# Supplementary material
Source: ML conference proceedings conference paper supplement (https://openaccess.thecvf.com/content/ICCV2023/html/Wang_Mixed_Neural_Voxels_ICCV_2023_paper.html)
Supplement: Supplementary file 2 [file Wang_Mixed_Neural_Voxels_ICCV_2023_supplemental.zip]

Archive with 2 entries (2 files):
- Appendix_ICCV2023_5238_MixVoxels.pdf
- mixvoxels_supp.mp4
